# Supplementary material for: Optimizing Public Health Preparedness for Highly Infectious Diseases in Central Vietnam
Source: Preprints.org preprint supplement (doi:10.20944/preprints202207.0339.v1), 2022-07-22
Supplement: Supplementary file 3 [file Infectious Disease Survey Questionnaire.docx]

**TOPIC VI: Infectious Disease Survey Questionnaire**

**6.1** Does your hospital have preparations in place for highly infectious disease outbreaks/epidemics?

**6.2** If a patient is suspected of having Ebola, is the hospital prepared? (yes/no)

**6.3** Does your hospital have the diagnostic tests necessary to detect Ebola?

**6.4** Does your hospital have PPE (personal protective equipment) available for staff when dealing with patients suspected of having a highly infectious disease (e.g. Ebola)?

**6.5** Are staff trained to use PPE? (yes/no) If yes, which staff members: doctors, nurses, lab staff?

**6.6** Is there an isolation unit or facility outside/near the main hospital for patients suspected of having a highly infectious disease?

**6.7** Is there an Isolation laboratory available for patients suspected of having a highly infectious agent?

**6.8** If a patient walks in with Ebola Virus Disease (EVD), what are the first steps taken to **isolate/quarantine** the patient with EVD?

**6.9** Is the patient transferred to a referral hospital?

**6.10** What method of transportation is used?

**6.11** If a patient walks in with Ebola Virus Disease (EVD), what are the first steps taken to **detect** and diagnose EVD?

**6.12** Do you have molecular diagnostics available for any of the highly infectious diseases below? (yes/no) If yes, please specify.

Zika Virus:

Mers-CoV:

Ebola:

Avian Flu:

SARS:

TB:

Resistant TB:

Others:

**6.13** In general, does your hospital have the proper isolation/quarantine equipment and facility to successfully contain a highly infectious disease? If yes, please explain.

**6.14** In general, does your hospital have molecular diagnostics available to detect for highly infectious diseases? If yes, please specify.

Version 1.1 January 7, 2018

Created by: Amanullah Zadran
